# Supplementary material for: Adipocyte Reprogramming by the Transcriptional Coregulator GPS2 Impacts Beta Cell Insulin Secretion
Source: PubMed Central journal article supplement — Cell Rep. 2020 Sep 15;32(11):108141. doi: 10.1016/j.celrep.2020.108141 (PMC7495095; doi:10.1016/j.celrep.2020.108141), 2020-09-15
Supplement: mmc1.pdf [file mmc1.pdf]

**Cell Reports, Volume 32**

**Supplemental Information**

**Adipocyte Reprogramming**

**by the Transcriptional Coregulator**

**GPS2 Impacts Beta Cell Insulin Secretion**

**Karima Drareni, Raphaëlle Ballaire, Fawaz Alzaid, Andreia Goncalves, Catherine Chollet, Serena Barilla, Jean-Louis Nguewa, Karine Dias, Sophie Lemoine, Jean-Pierre Riveline, Ronan Roussel, Elise Dalmas, Gilberto Velho, Eckardt Treuter, Jean-François Gautier, and Nicolas Venteclef**

|                            | Low GPS2 mRNA expression | High GPS2 mRNA expression | <i>p</i> |
|----------------------------|--------------------------|---------------------------|----------|
| N                          | 12                       | 11                        |          |
| GPS2 mRNA expression*      | 0.30 [0.32]              | 0.98 [0.51]               | <0.0001  |
| Sex: men (%)               | 75                       | 60                        | 0.65     |
| Age (y)                    | 48 ± 13                  | 48 ± 10                   | 0.96     |
| BMI (kg/m <sup>2</sup> )   | 29.1 ± 2.7               | 30.8 ± 4.0                | 0.24     |
| T2DM: N (%)                | 10 (92)                  | 4 (40)                    | 0.02     |
| HbA1c (%)                  | 7.0 ± 0.5                | 5.8 ± 0.3                 | <0.0001  |
| SBP (mmHg)                 | 126 ± 14                 | 122 ± 15                  | 0.52     |
| DBP (mmHg)                 | 82 ± 10                  | 78 ± 10                   | 0.30     |
| Total cholesterol (mmol/l) | 4.65 ± 0.96              | 4.99 ± 1.40               | 0.49     |
| Triglycerides (mmol/l)     | 1.16 ± 0.21              | 1.25 ± 0.86               | 0.79     |
| Creatinine (μmol/l)        | 82 ± 17                  | 73 ± 19                   | 0.27     |

**Supplementary Table S1 (Related to Figure 1):** Clinical and anthropometric human data.  
Mean ± SD or \*median [IQR]

**A**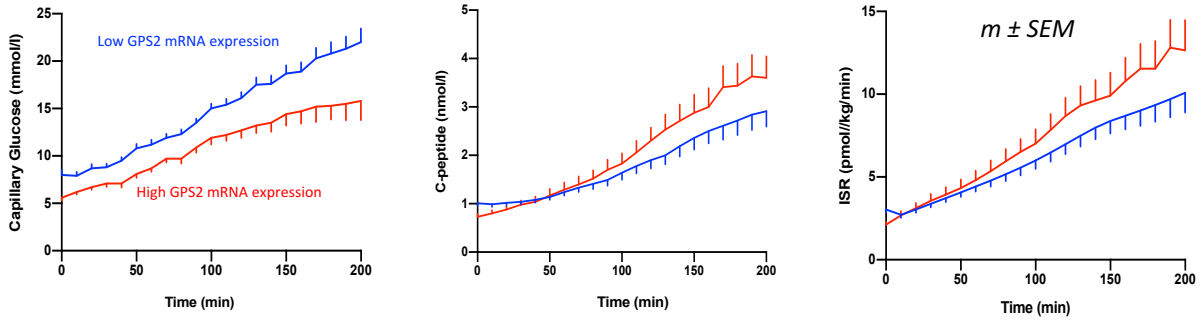**B**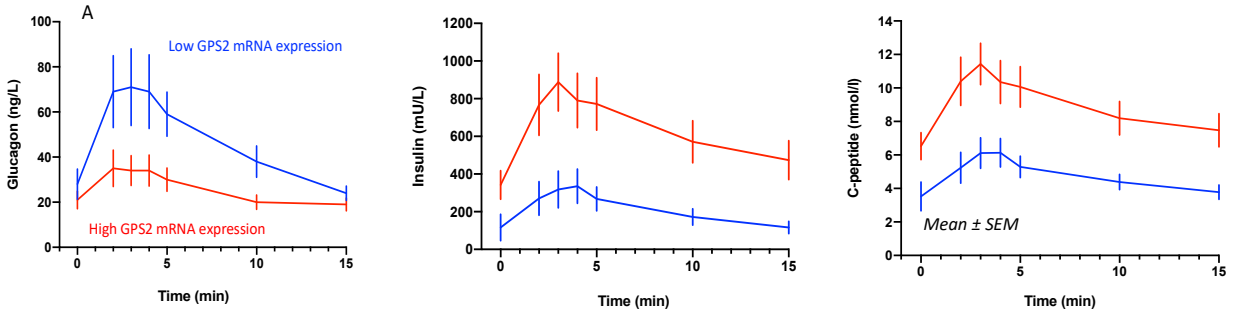**C**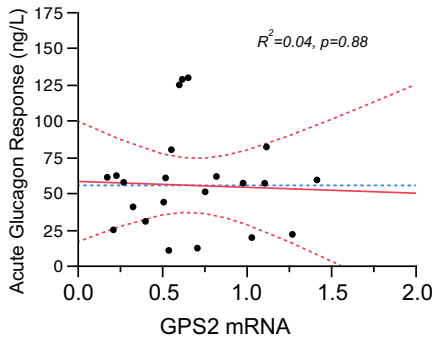

\*adjusted for sex, age, glycemic status (T2DM or ND), and pre-arginine injection glucose and insulin levels

**Supplementary Figure S1 (Related to Figure 1):** (A) Capillary blood glucose, plasma C-peptide and Insulin Secretion Rate (ISR) during a graded glucose infusion. Participants were stratified by GPS2 mRNA expression as Low or High expression as per values below (n=12) or above the median (n=11), respectively. (B) Glucagon, Insulin and C-peptide levels during a glucose-dependent arginine stimulation by adipocyte GPS2 mRNA expression. (C) Correlation of Acute Insulin Response (AIR) during a glucose-dependent arginine stimulation and adipocyte GPS2 mRNA expression in multivariate analyses. Correlation adjusted for sex, age, glycemic status (T2DM or ND), and pre-arginine injection glucose levels

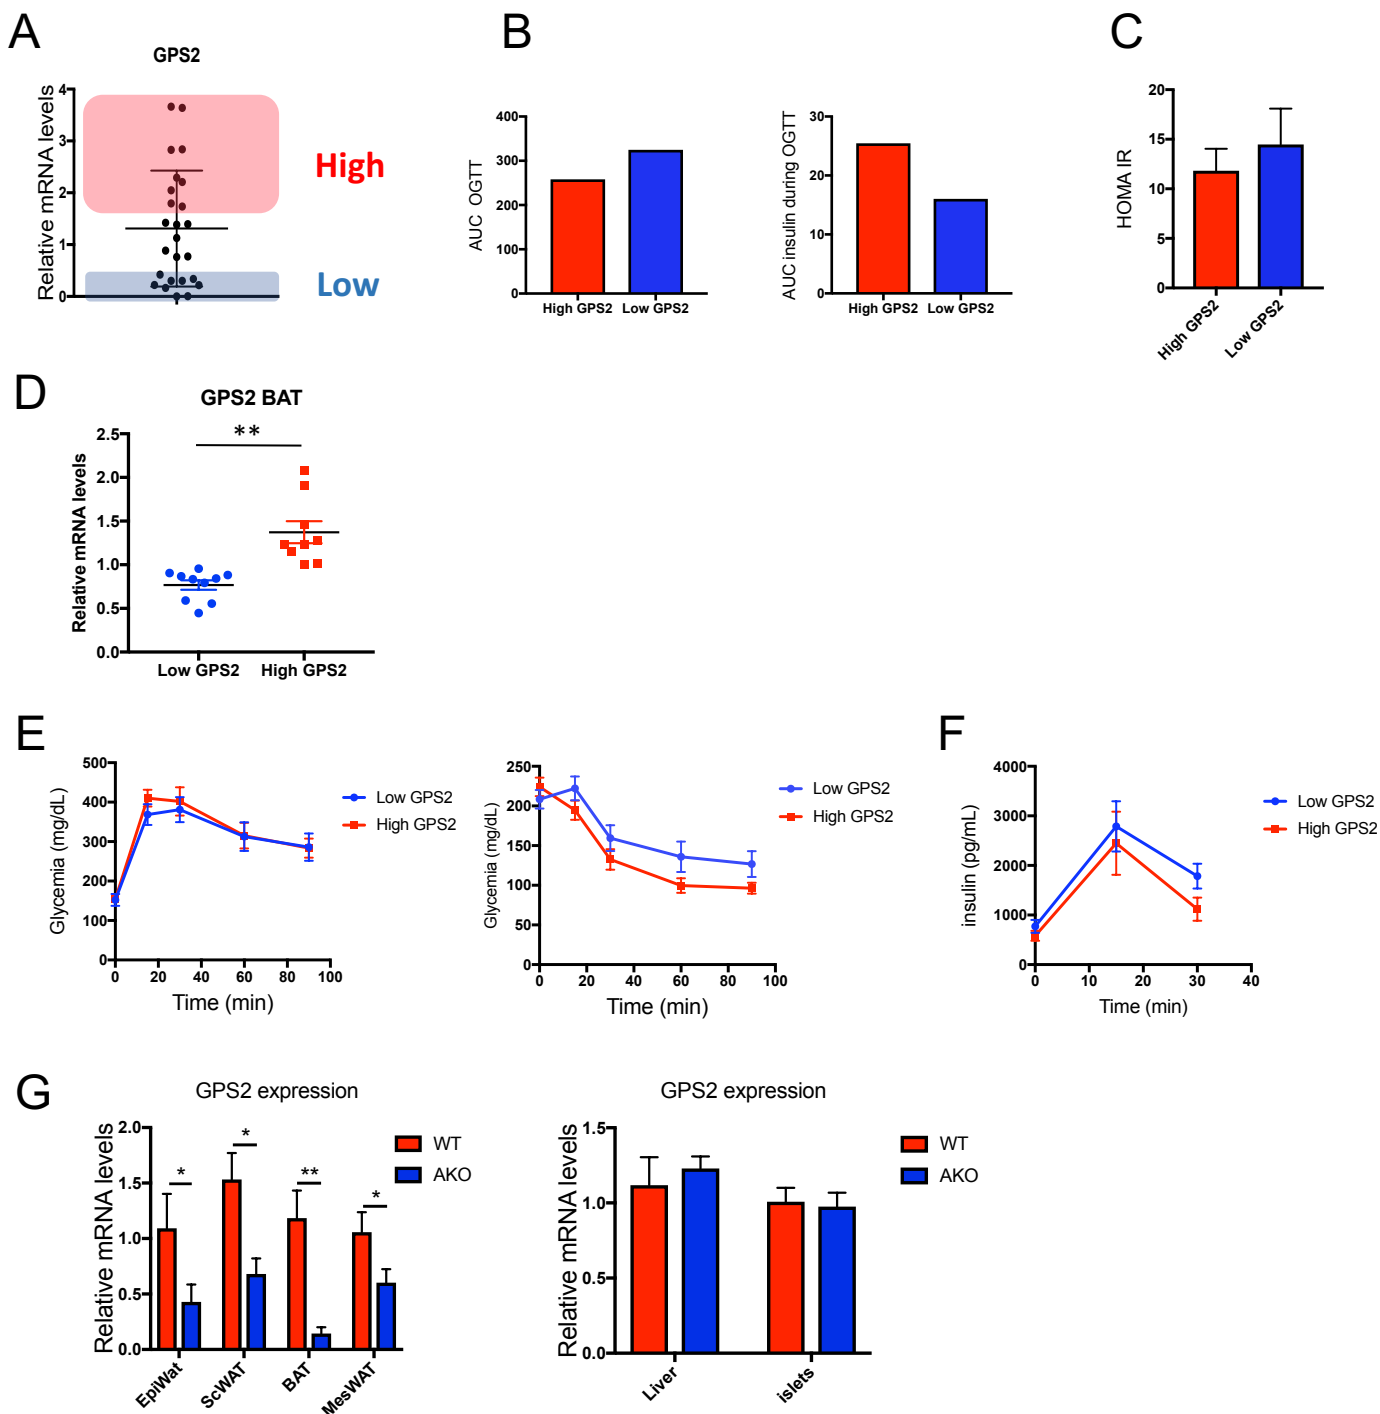

**Supplementary Figure S2 (Related to Figure 2) :** (A) RT-qPCR analysis of *GPS2* in eWAT from WT C57BL6/J under High Fat Diet (HFD) during 12 weeks (n= 28). (B) Area Under the Curve (AUC) of the OGTT of figure 2B and 2C. (C) Index of Insulin resistance (HOMA-IR) of *GPS2* low versus high expression in WAT of high fat fed mice for 12 weeks (n=9 in each group). (D) RT-qPCR analysis of *GPS2* in BAT from WT C57BL6/J under High Fat Diet (HFD) during 12 weeks (n=19). (E). Oral Glucose Tolerance Test (OGTT) and insulin tolerance test (ITT) in WT C57BL6/J after 12 weeks of HFD classified into 2 groups: high *GPS2* expression (n=9) and low *GPS2* expression (n=10). (F) Measurements of insulin secretion during the Oral Glucose Tolerance Test in WT C57BL6/J after 12 weeks of HFD classified into 2 groups: high *GPS2* expression (n=9) and low *GPS2* expression (n=9). (G) RT-qPCR analysis of *GPS2* in eWAT , scWAT, mesWAT, BAT, liver and islets from WT and *GPS* AKO mice on CD (n= 5-6). All data are represented as mean  $\pm$  S.E.M. \*P <0.05, \*\* P <0.01, \*\*\* P <0.001.

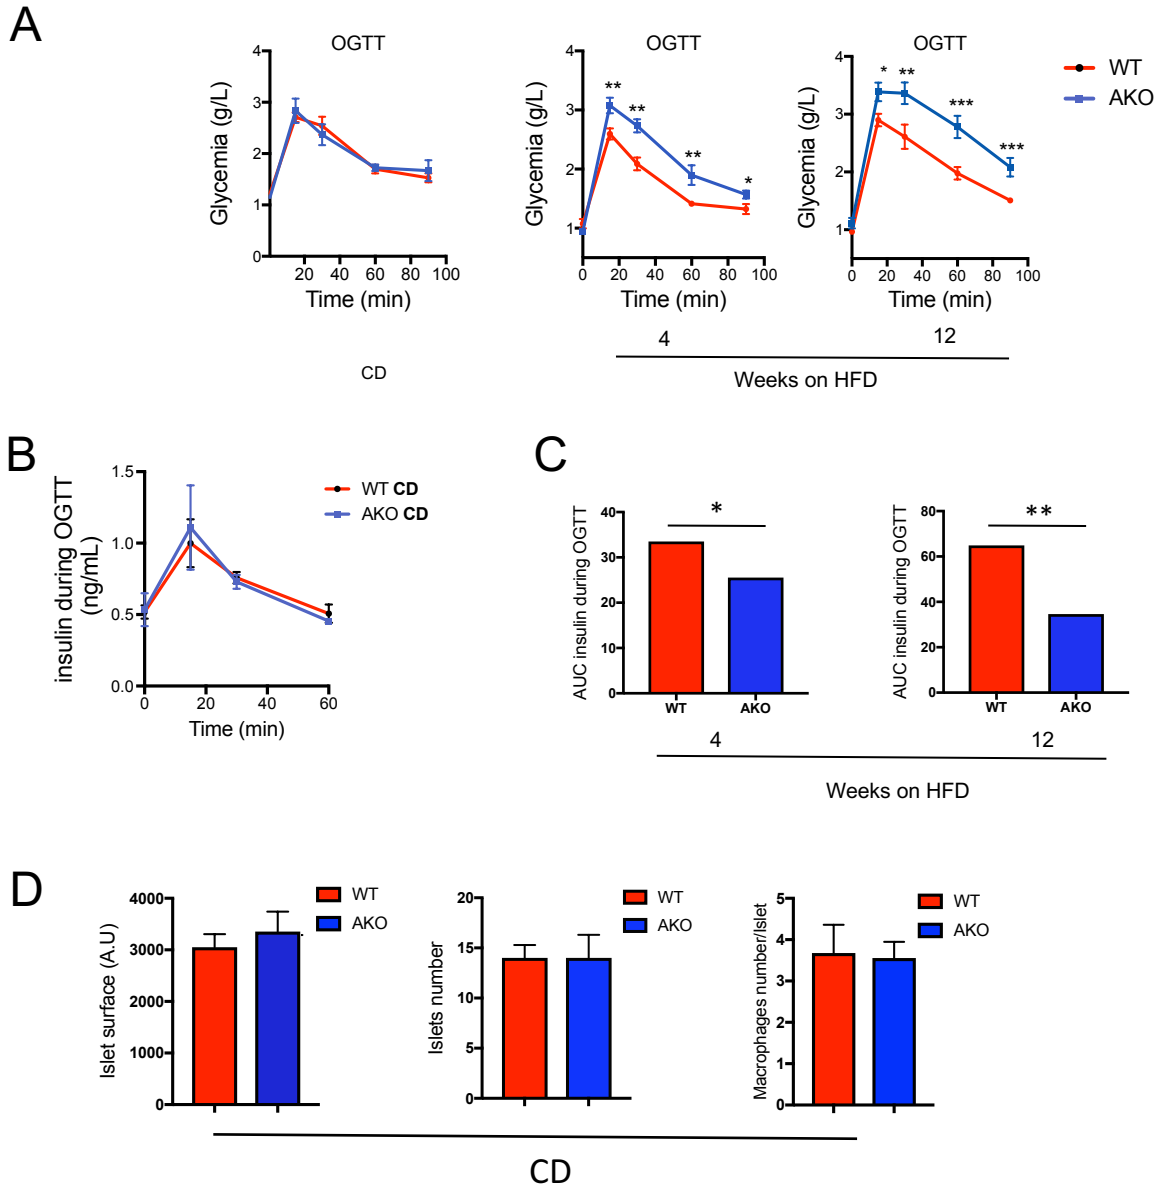

**Supplementary Figure S3 (Related to Figure 2 and 3) :** (A) Oral Glucose Tolerance Test (OGTT) in WT controls and GPS2 AKO after CD ,4 and 12 weeks of HFD (CD=4-5, 4 weeks HFD n=6, 12 weeks HFD n= 5-6). (B) Insulin concentration measured during OGTT in in WT controls and GPS2 AKO C57BL6 after CD (n=4-5). (C) Area Under the Curve (AUC) of insulin concentration during the OGTT of figure 2F. All data are represented as mean  $\pm$  S.E.M. \*P <0.05, \*\* P <0.01, \*\*\* P <0.001. (D) Measurements of islets surface and number and macrophages number in pancreas from WT and GPS2 AKO mice under CD (n=4-5). All data are represented as mean  $\pm$  S.E.M. \*P <0.05, \*\* P <0.01, \*\*\* P <0.001.

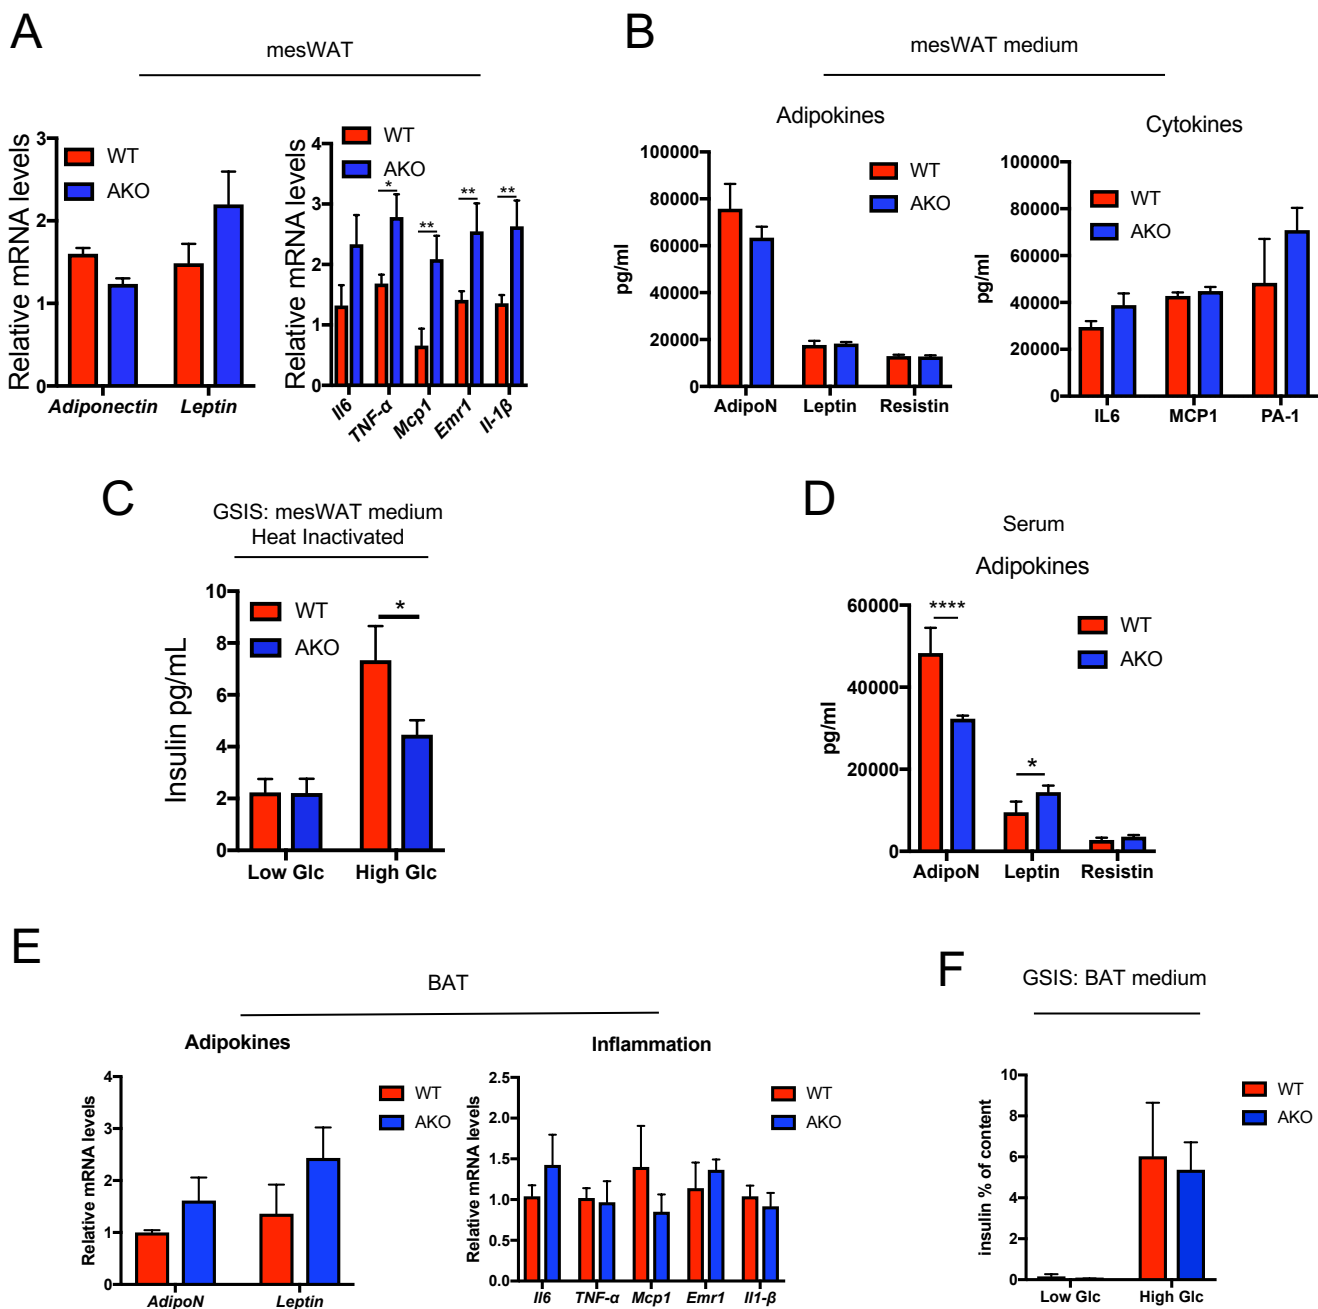

**Supplementary Figure S4 (related to Figure 4):** (A and B) WAT Gene expression and WAT secretome analysis of mesWAT from WT and GPS2 AKO mice after 12 weeks of HFD (n=4). (C) Glucose Stimulated Insulin Secretion (GSIS) of islets from WT C57BL6/J mice cultured with mesWAT heat inactivated culture medium for 12h and treated for 2 h with low (2.8 mM) or high (16,7 Mm) glucose. Results are expressed in % of insulin content (n=3). (D) Serum concentration of adiponectin (AdipoN), leptin and resistin of WT and GPS2 AKO mice after 12 weeks of HFD (n=6 in each group). (E) Measurement of adipokines and inflammatory genes by RT-qPCR in BAT from WT and GPS2 AKO mice in 12 weeks of HFD (n=5-6). (F) Glucose Stimulated Insulin Secretion (GSIS) of islets from WT C57BL6/J mice cultured with BAT culture medium for 12h and treated for 2 H with low glucose (Low Glc) (2.8 mM) and high glucose (High Glc) (16,7 Mm). All data are represented as mean  $\pm$  S.E.M. \*P < 0.05, \*\* P < 0.01, \*\*\* P < 0.001.
